# Supplementary material for: Metabolomics of Small Intestine Neuroendocrine Tumors and Related Hepatic Metastases
Source: PubMed Central journal article supplement (PMC6950539; doi:10.3390/metabo9120300), 2019-12-11
Supplement: metabolites-09-00300-s001.pdf [file metabolites-09-00300-s001.pdf]

**Table 1**

| N° | Metabolite               | Group                                                     | <sup>1</sup> H chemical shift (ppm) |
|----|--------------------------|-----------------------------------------------------------|-------------------------------------|
| 1  | Taurine                  | -CH <sub>2</sub> -NH <sub>3</sub> <sup>+</sup>            | 3.27                                |
|    |                          | -CH <sub>2</sub> -SO <sub>3</sub> <sup>-</sup>            | 3.42                                |
| 2  | Aspartate                | βCH <sub>2</sub> (u)                                      | 2.69                                |
|    |                          | βCH <sub>2</sub> (d)                                      | 2.81                                |
|    |                          | αCH                                                       | 3.89                                |
| 3  | Serine                   | αCH                                                       | 3.84                                |
|    |                          | βCH <sub>2</sub> (u)                                      | 3.94                                |
|    |                          | βCH <sub>2</sub> (d)                                      | 3.99                                |
| 4  | Acetate                  | CH <sub>3</sub>                                           | 1.92                                |
| 5  | N Acetyl Aspartate (NAA) | CH <sub>3</sub>                                           | 2.02                                |
| 6  | Isoleucine               | δCH <sub>3</sub>                                          | 0.94                                |
|    |                          | γCH <sub>3</sub>                                          | 1.01                                |
|    |                          | γCH <sub>2</sub>                                          | 1.27                                |
|    |                          | αCH                                                       | 3.68                                |
|    |                          | C4H                                                       | 3.41                                |
| 7  | β-Glucose                | C3H, C5H                                                  | 3.48                                |
|    |                          | C6H(u)                                                    | 3.76                                |
|    |                          | C6H(d)                                                    | 3.89                                |
|    |                          | C1H                                                       | 4.65                                |
|    |                          | CH <sub>2</sub>                                           | 3.56                                |
| 8  | Glycine                  | CH <sub>2</sub>                                           | 3.56                                |
| 9  | Valine                   | γCH <sub>3</sub>                                          | 0.99                                |
|    |                          | γ'CH <sub>3</sub>                                         | 1.04                                |
|    |                          | βCH                                                       | 2.28                                |
| 10 | Lactate                  | CH <sub>3</sub>                                           | 1.33                                |
|    |                          | CH                                                        | 4.12                                |
| 11 | Alanine                  | βCH <sub>3</sub>                                          | 1.48                                |
|    |                          | αCH                                                       | 3.78                                |
|    |                          | C5H                                                       | 3.27                                |
| 12 | myo-Inositol             | C1H, C3H                                                  | 3.53                                |
|    |                          | C4H, C6H                                                  | 3.62                                |
|    |                          | C2H                                                       | 4.05                                |
|    |                          | -CHOH-                                                    | 4.02                                |
| 13 | Ascorbate                | C4H                                                       | 4.52                                |
|    |                          | CH <sub>2</sub> -CONH                                     | 2.56                                |
|    |                          | CH <sub>2</sub> -SH                                       | 2.95                                |
| 14 | Glutathione (GSH)        | CH-NH <sub>2</sub>                                        | 3.79                                |
|    |                          | βCH <sub>2</sub>                                          | 2.09                                |
|    |                          | γCH <sub>2</sub>                                          | 2.34                                |
| 15 | Glutamate                | αCH                                                       | 3.76                                |
|    |                          | all Hs                                                    | 3.34                                |
|    |                          | (α,β) CH <sub>2</sub>                                     | 2.41                                |
| 17 | Succinate                | (α,β) CH <sub>2</sub>                                     | 2.41                                |
| 18 | Fumarate                 | all CH                                                    | 6.52                                |
| 19 | Glutamine                | βCH <sub>2</sub>                                          | 2.14                                |
|    |                          | γCH <sub>2</sub>                                          | 2.45                                |
|    |                          | αCH <sub>2</sub>                                          | 3.78                                |
| 20 | Arginine                 | γCH <sub>2</sub> (u)                                      | 1.64                                |
|    |                          | γCH <sub>2</sub> (d)                                      | 1.72                                |
|    |                          | βCH <sub>2</sub>                                          | 1.92                                |
|    |                          | δCH <sub>2</sub>                                          | 3.25                                |
|    |                          | αCH                                                       | 3.78                                |
| 21 | Creatine                 | CH <sub>3</sub>                                           | 3.03                                |
|    |                          | CH <sub>2</sub>                                           | 3.94                                |
| 22 | Ethanolamine             | -CH <sub>2</sub> -NH <sub>3</sub> <sup>+</sup>            | 3.14                                |
|    |                          | CH <sub>2</sub> OH                                        | 3.82                                |
| 23 | Choline                  | -N <sup>+</sup> -(CH <sub>3</sub> ) <sub>3</sub>          | 3.22                                |
|    |                          | βCH <sub>2</sub>                                          | 3.54                                |
|    |                          | αCH                                                       | 4.07                                |
| 24 | Glycerophosphocholine    | -N <sup>+</sup> -(CH <sub>3</sub> ) <sub>3</sub>          | 3.24                                |
|    |                          | αCH <sub>2</sub> -OH                                      | 3.65                                |
|    |                          | βCH <sub>2</sub> -OH and -CH <sub>2</sub> -N <sup>+</sup> | 3.70                                |
|    |                          | CH <sub>2</sub> -PO <sub>4</sub> and CHO                  | 3.92                                |
|    |                          | CH <sub>2</sub> -PO <sub>4</sub>                          | 4.33                                |
| 25 | Phosphorylcholine        | -N <sup>+</sup> -(CH <sub>3</sub> ) <sub>3</sub>          | 3.23                                |
|    |                          | βCH <sub>2</sub>                                          | 3.61                                |
|    |                          | αCH                                                       | 4.16                                |
| 26 | Tyrosine                 | βCH <sub>2</sub> (u)                                      | 3.06                                |
|    |                          | βCH <sub>2</sub> (d)                                      | 3.20                                |
|    |                          | αCH                                                       | 3.94                                |
|    |                          | orthoCH                                                   | 6.89                                |
|    |                          | metaCH                                                    | 7.18                                |
| 27 | Tryptophan               | βCH <sub>2</sub> (up)                                     | 3.31                                |
|    |                          | βCH <sub>2</sub> (down)                                   | 3.49                                |
|    |                          | αCH                                                       | 4.06                                |
|    |                          | CH-NH                                                     | 7.32                                |
